# Supplementary figures and images for: ICAM-1 nanoclusters regulate hepatic epithelial cell polarity by leukocyte adhesion-independent control of apical actomyosin
Source: eLife journal article supplement (doi:10.7554/elife.89261), 2023-09-28

Fig. 1B

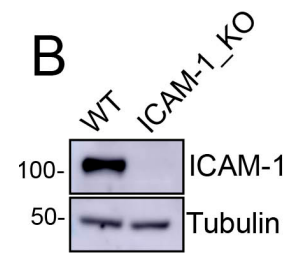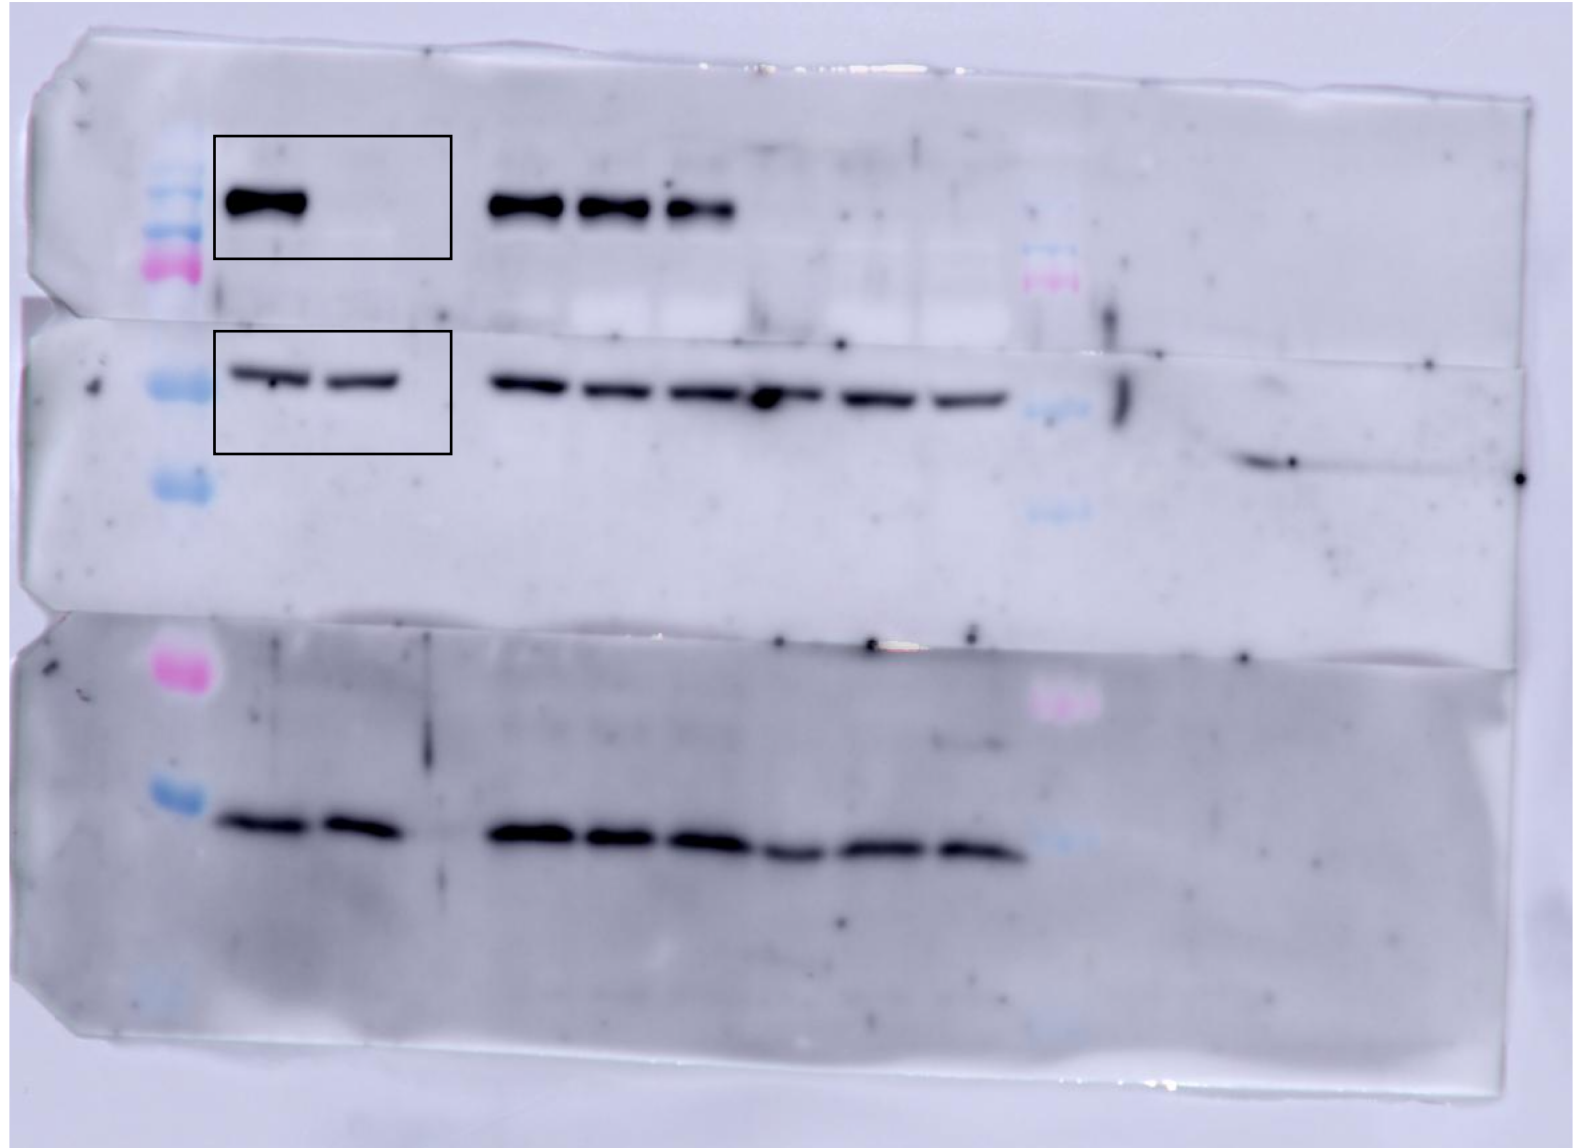

Supplement: fig1-data2 [file elife-89261-fig1-data2-v1.zip]

Fig. 1F

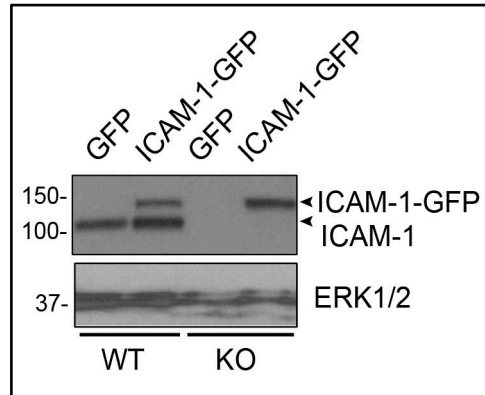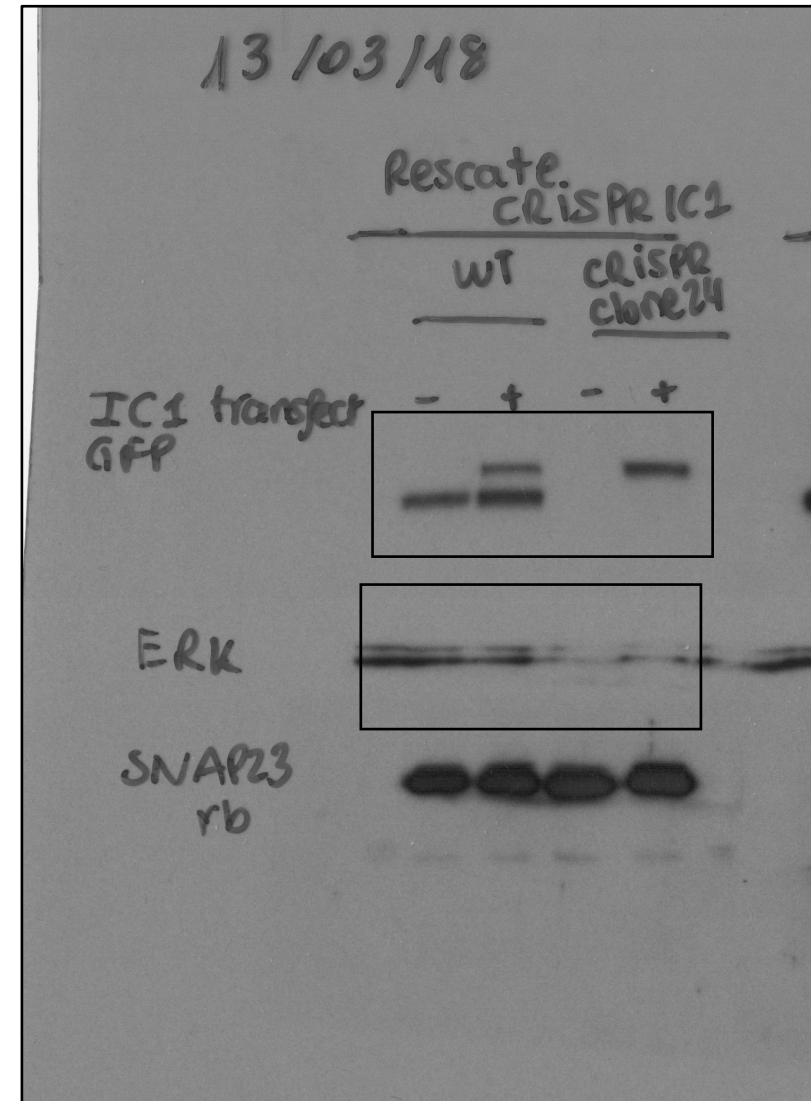

Supplement: fig1-data4 [file elife-89261-fig1-data4-v1.zip]

Fig1-figure supplement 1F  
(from screening several siRNA)

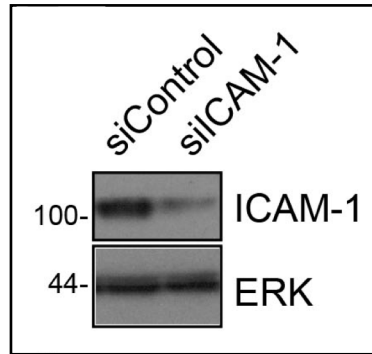

exposure for ICAM-1

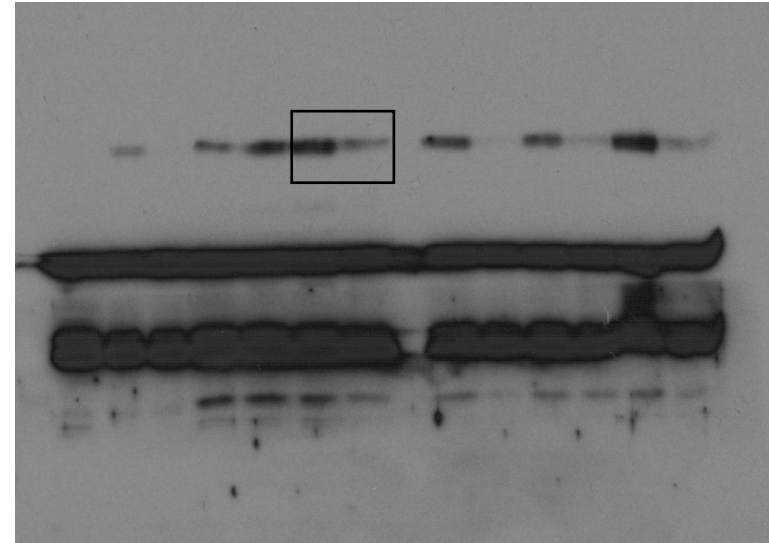

exposure for ERK

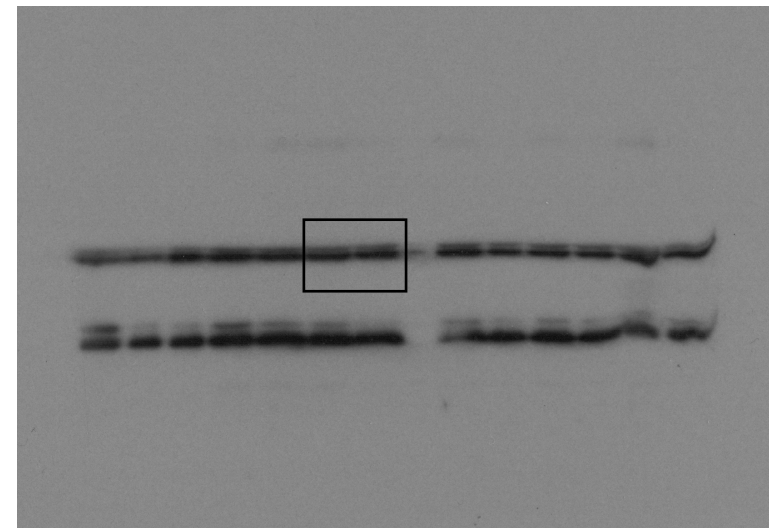

Supplement: fig1-figsupp1-data2 [file elife-89261-fig1-figsupp1-data2-v1.zip]

Fig2-figure supplement 1B

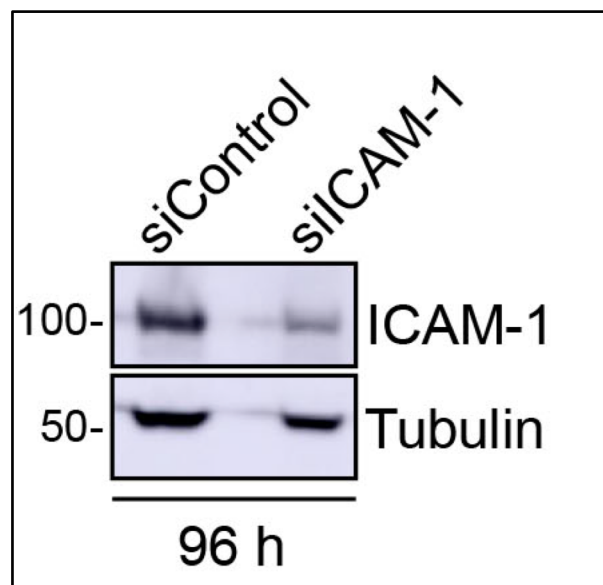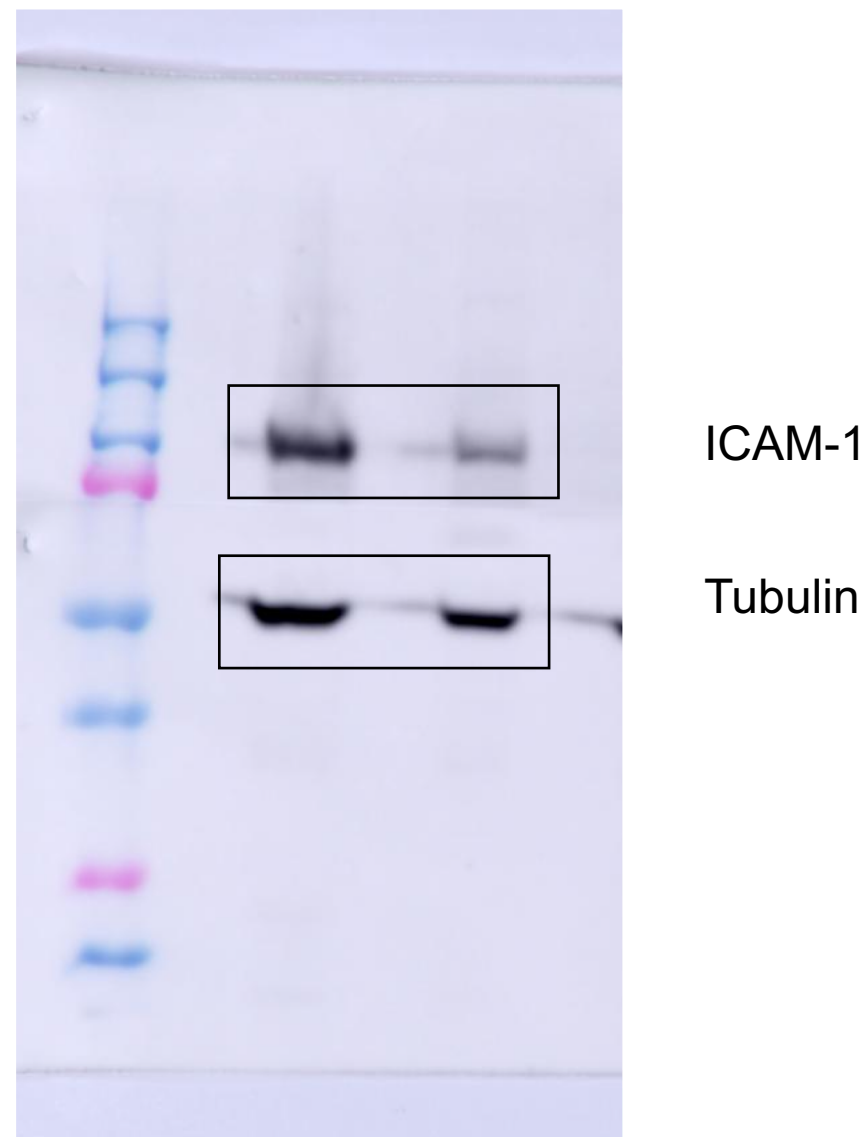

Supplement: fig2-figsupp1-data2 [file elife-89261-fig2-figsupp1-data2-v1.zip]

Fig. 3A

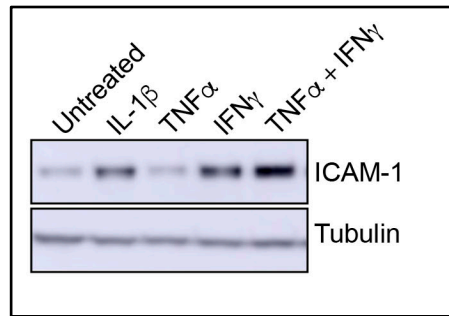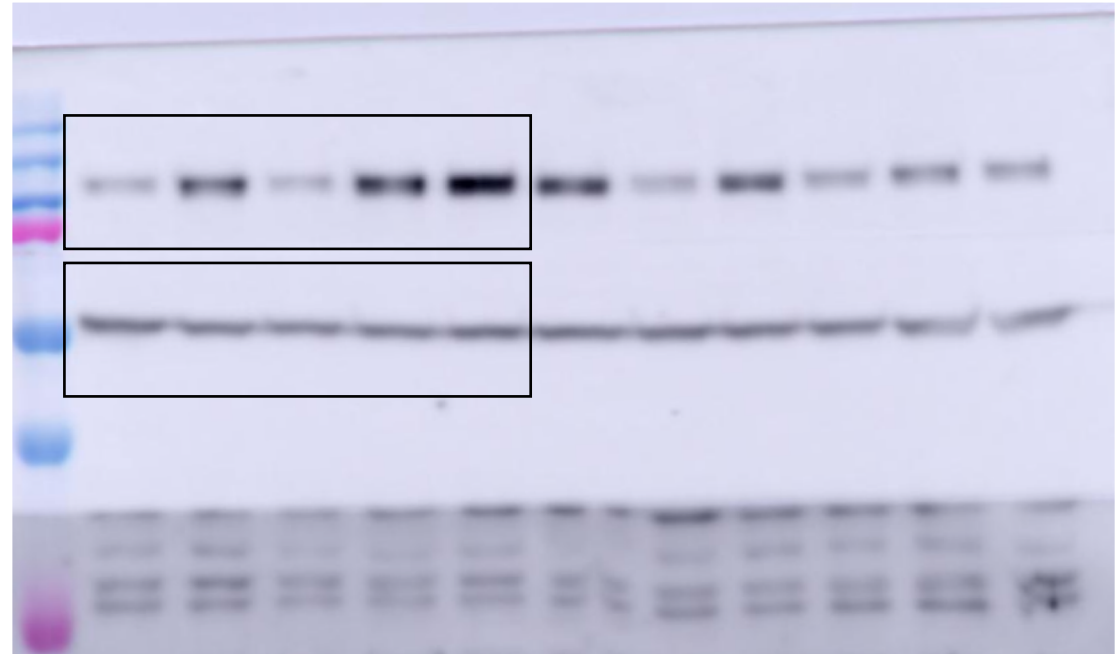

Supplement: fig3-data2 [file elife-89261-fig3-data2-v1.zip]

Fig. 5E

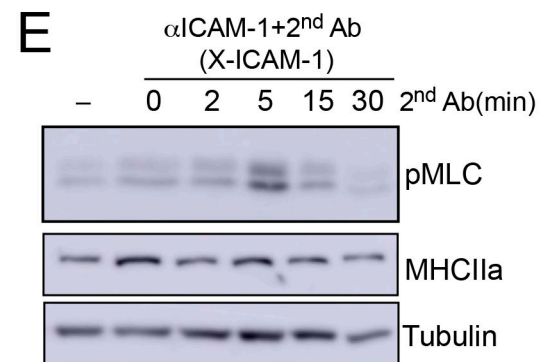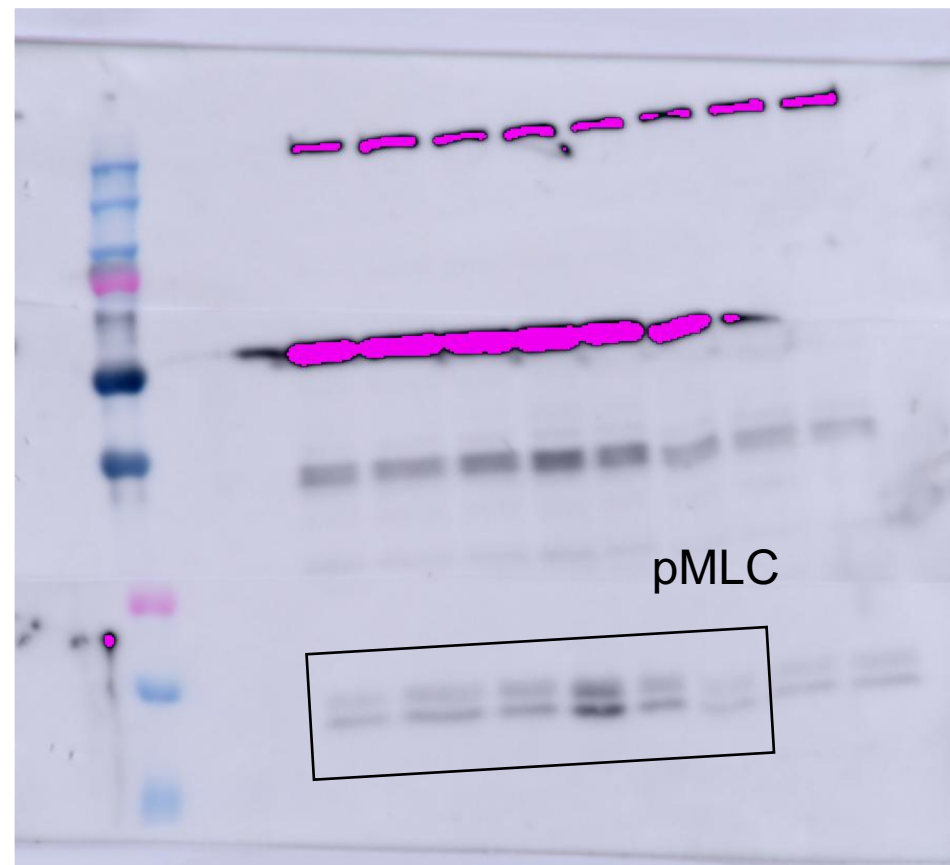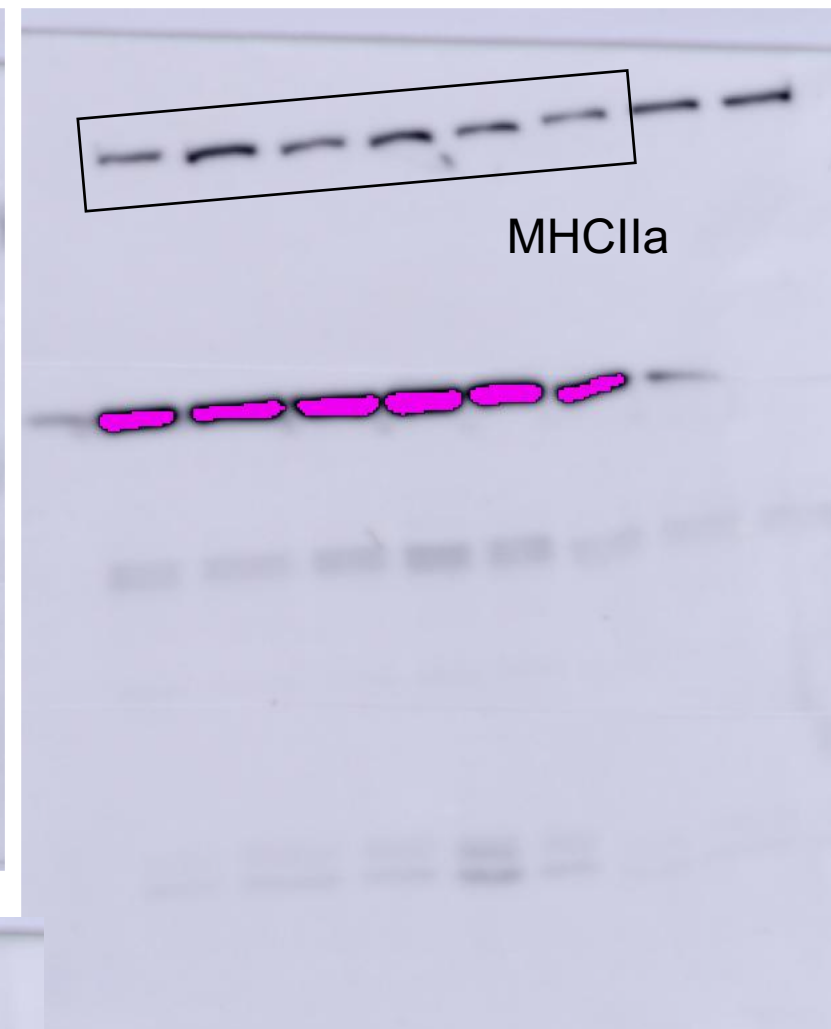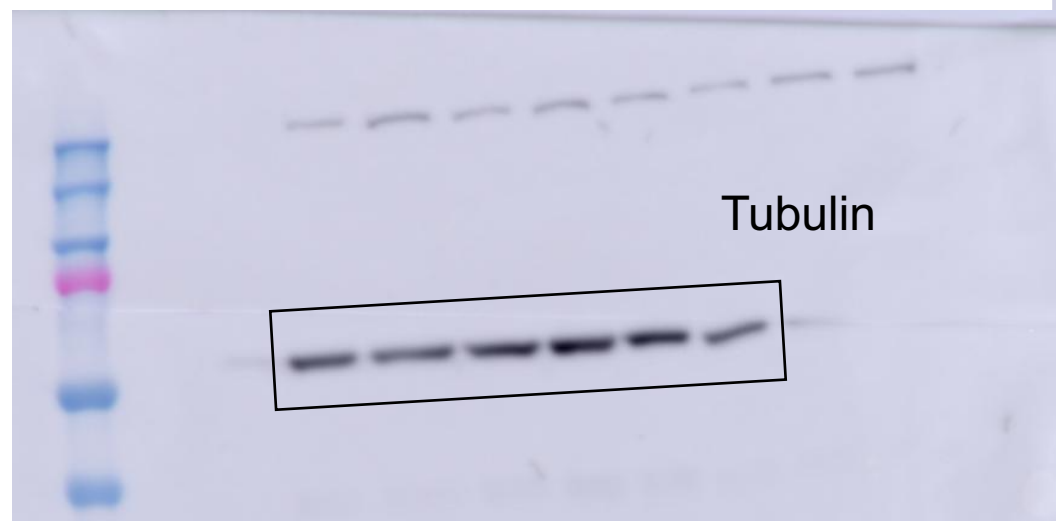

Supplement: fig5-data4 [file elife-89261-fig5-data4-v1.zip]

Fig5-figure supplement 1C

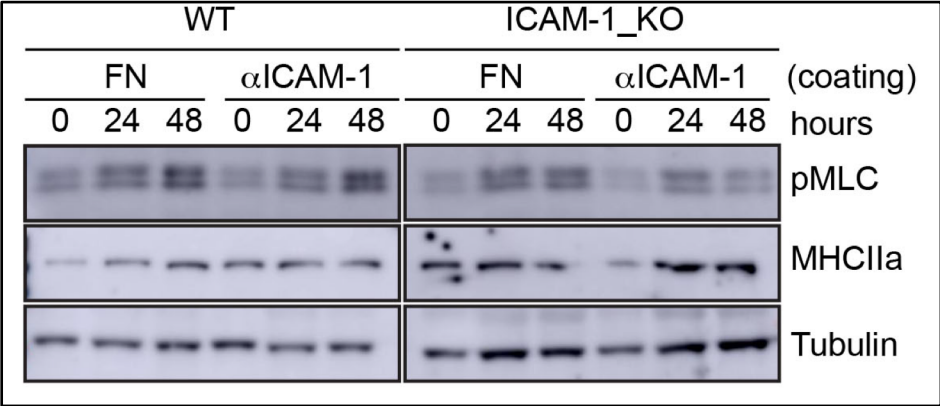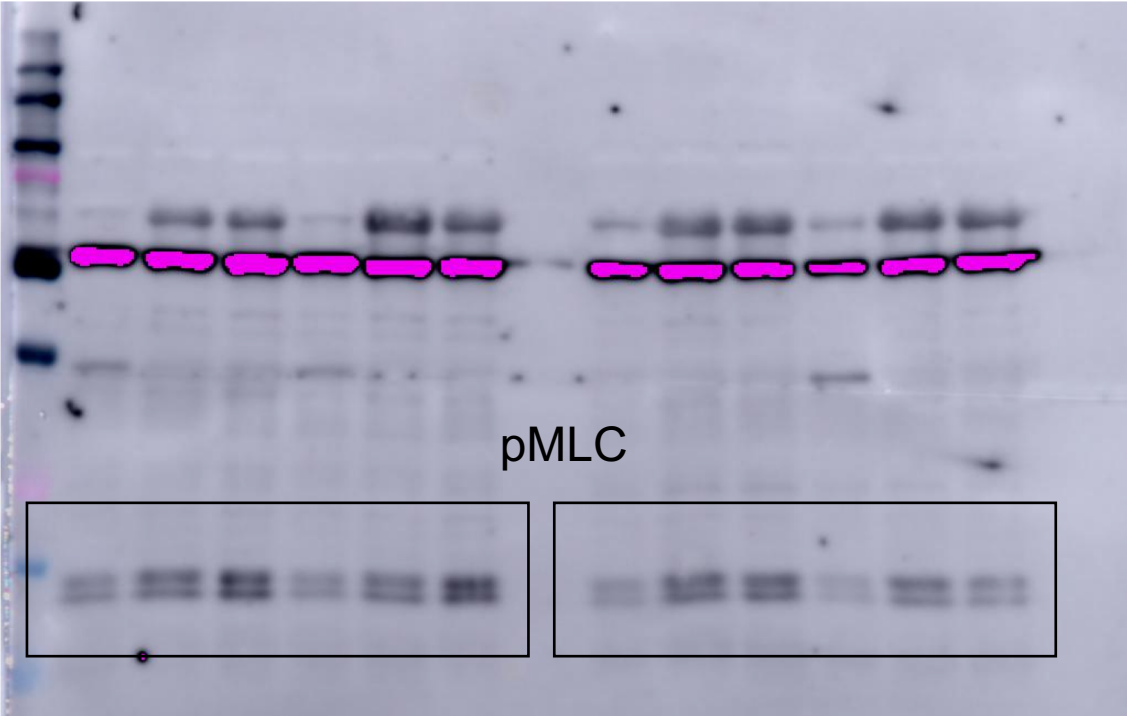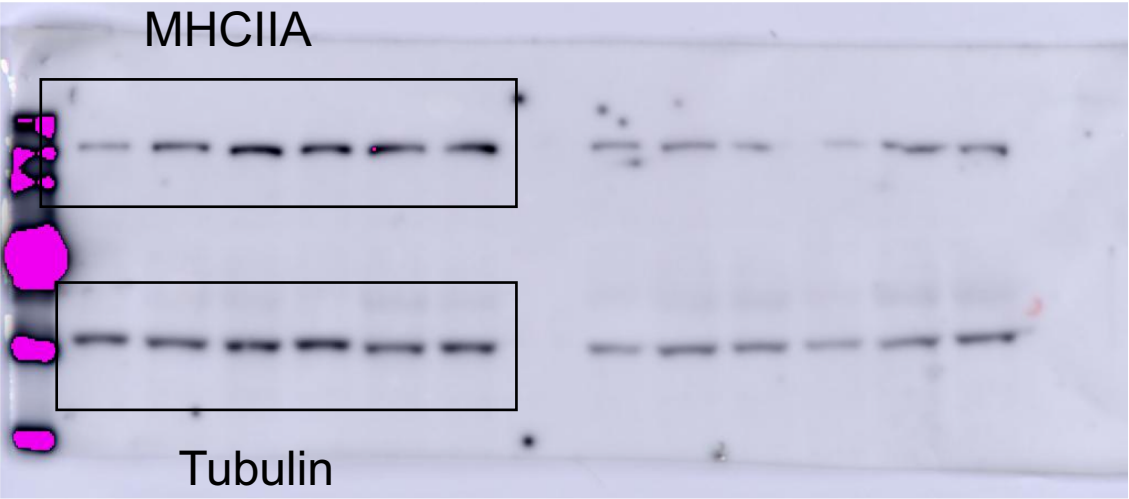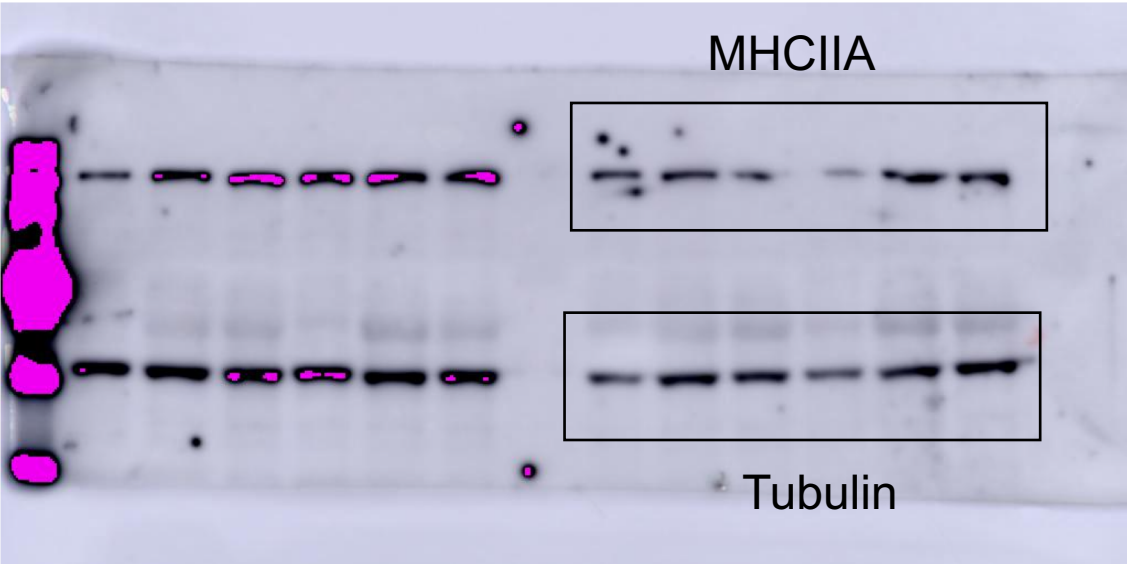

Supplement: fig5-figsupp1-data4 [file elife-89261-fig5-figsupp1-data4-v1.zip]

Fig. 6A

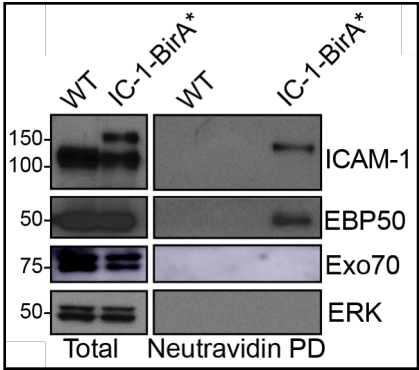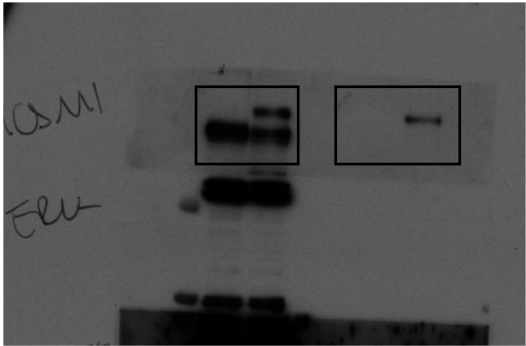

ICAM-1

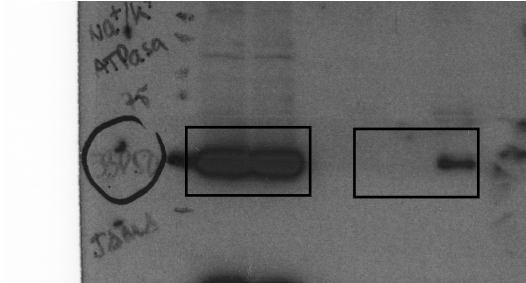

EBP50

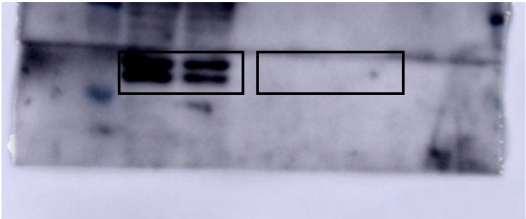

EXO70

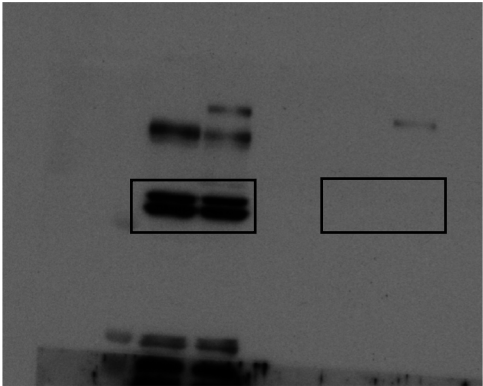

ERK

Supplement: fig6-data5 [file elife-89261-fig6-data5-v1.zip]

Fig. 6E

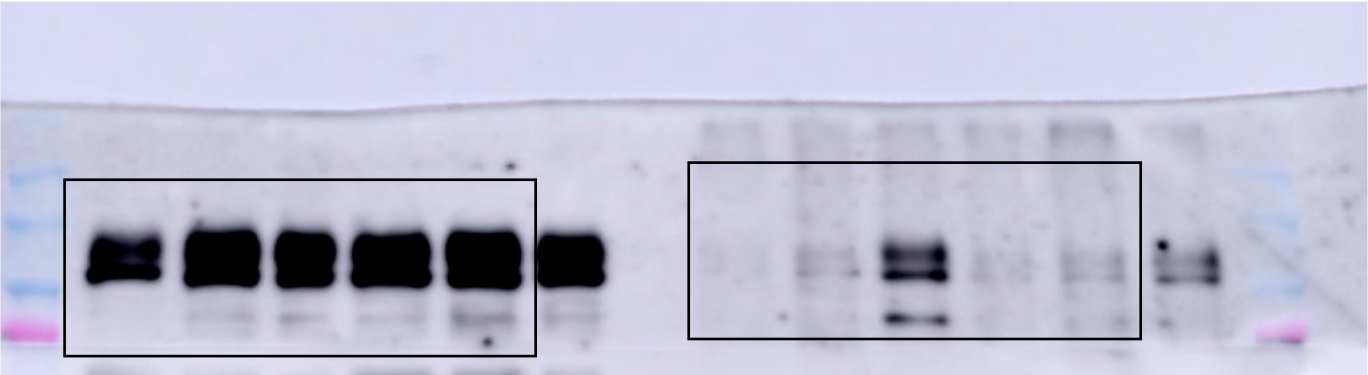

ICAM-1

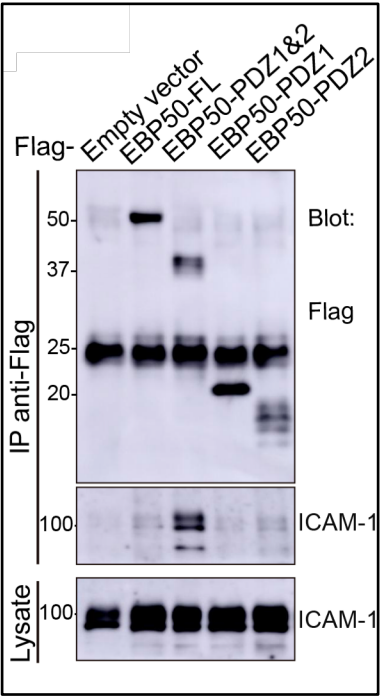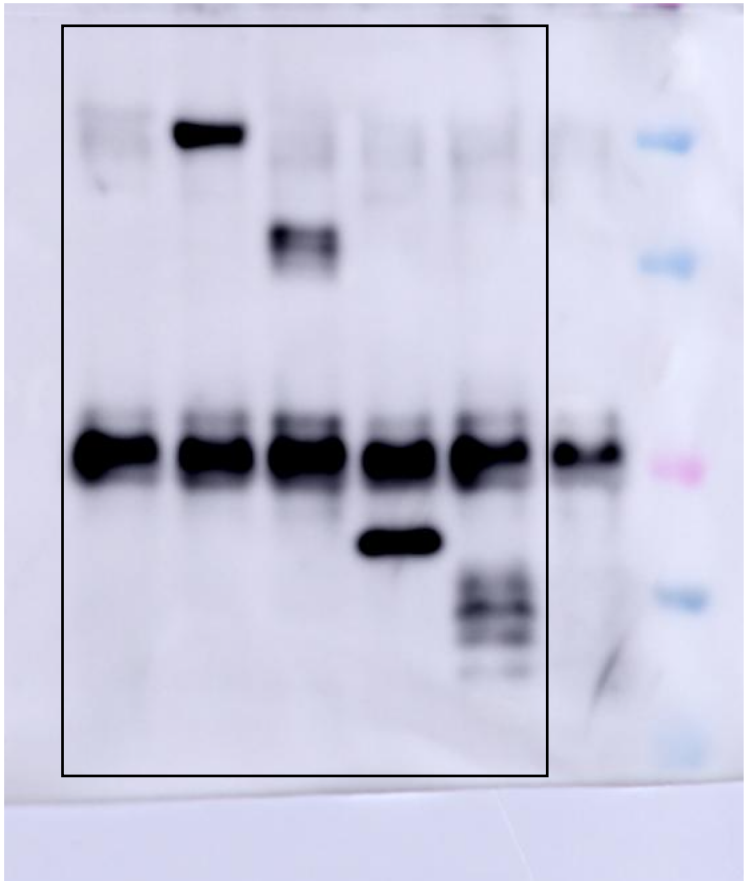

Flag

Supplement: fig6-data7 [file elife-89261-fig6-data7-v1.zip]

Fig6-supplement figure 1F

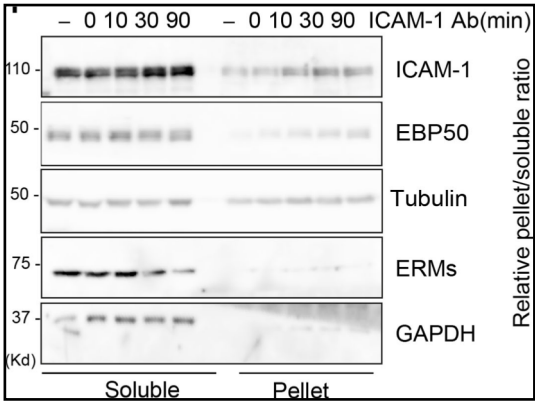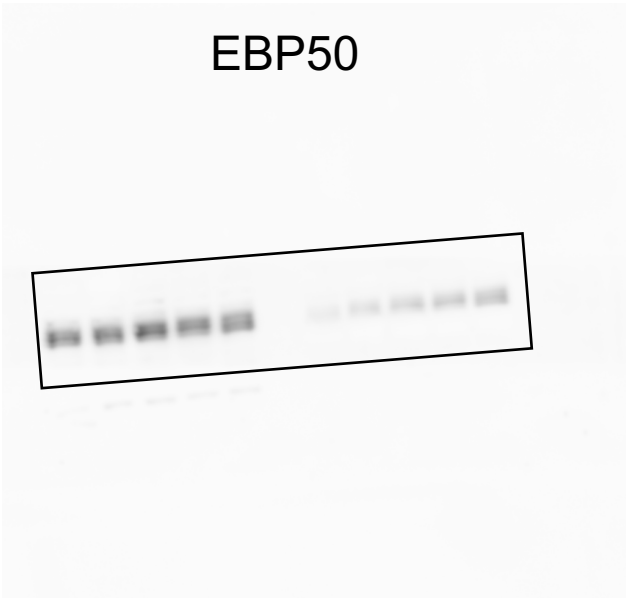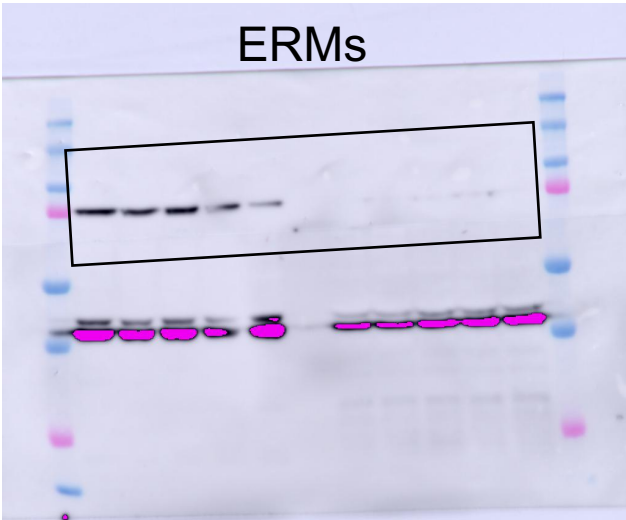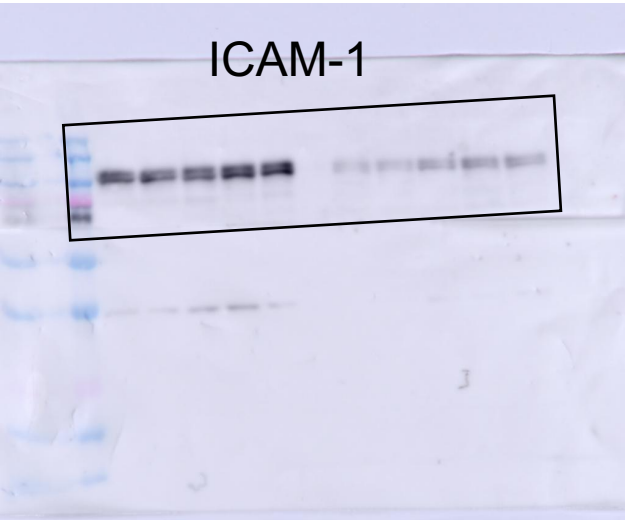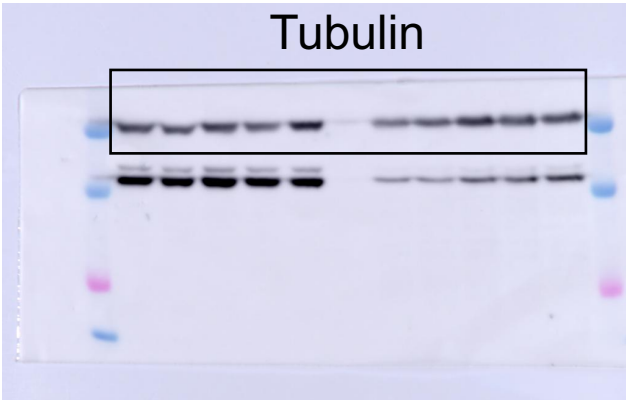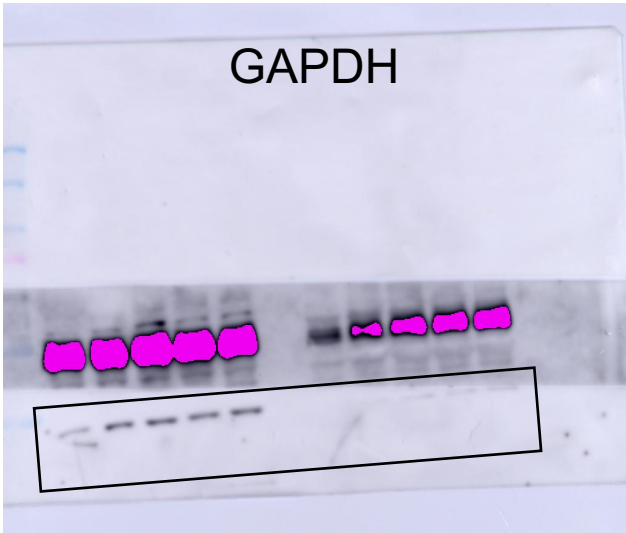

Supplement: fig6-figsupp1-data11 [file elife-89261-fig6-figsupp1-data11-v1.zip]

Fig6-figure supplement 1B

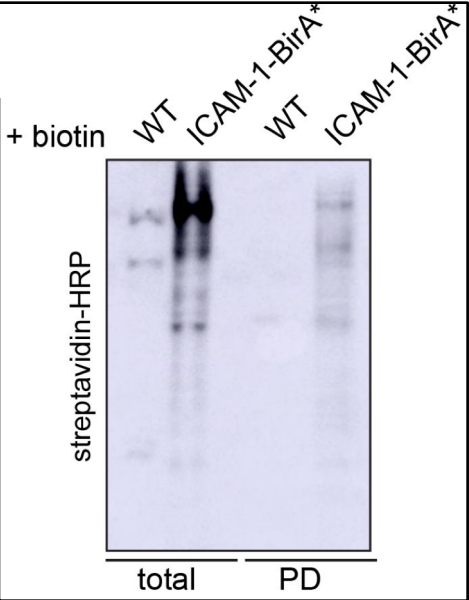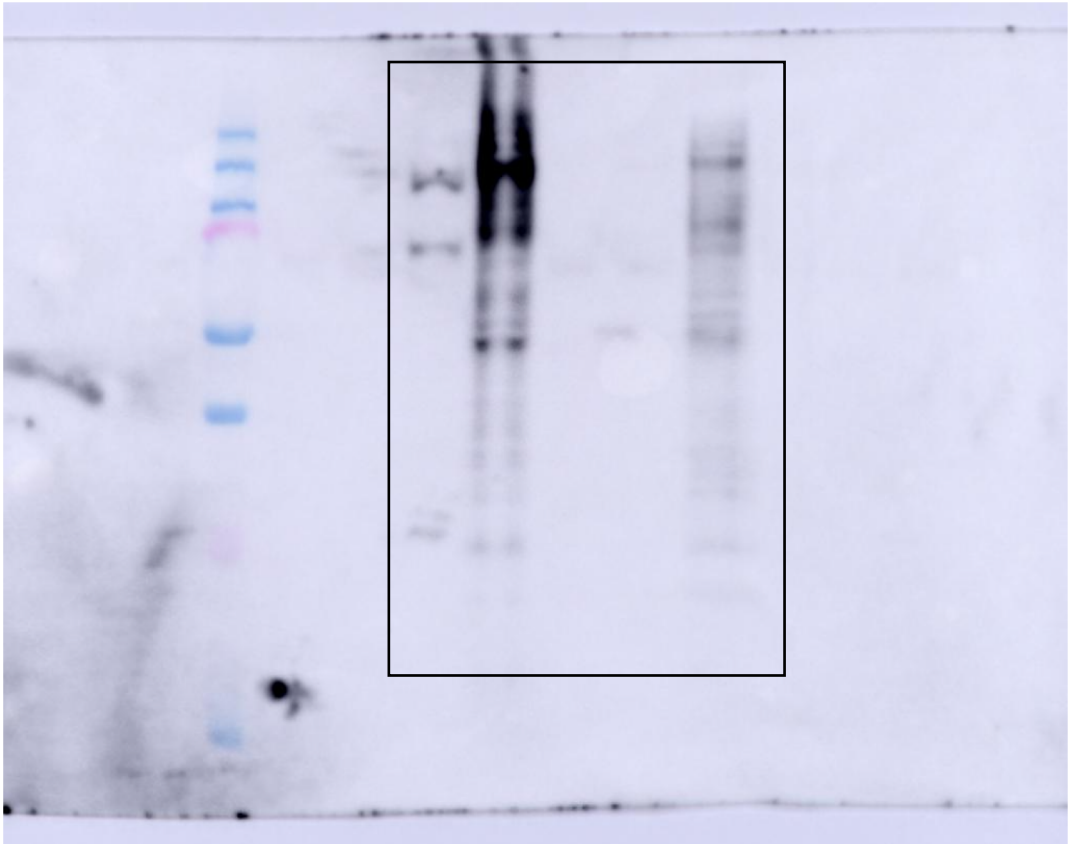

Supplement: fig6-figsupp1-data2 [file elife-89261-fig6-figsupp1-data2-v1.zip]

Fig6-supplement figure 1D

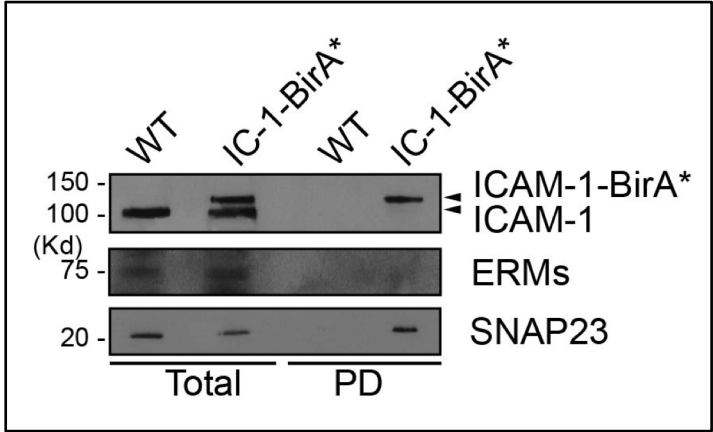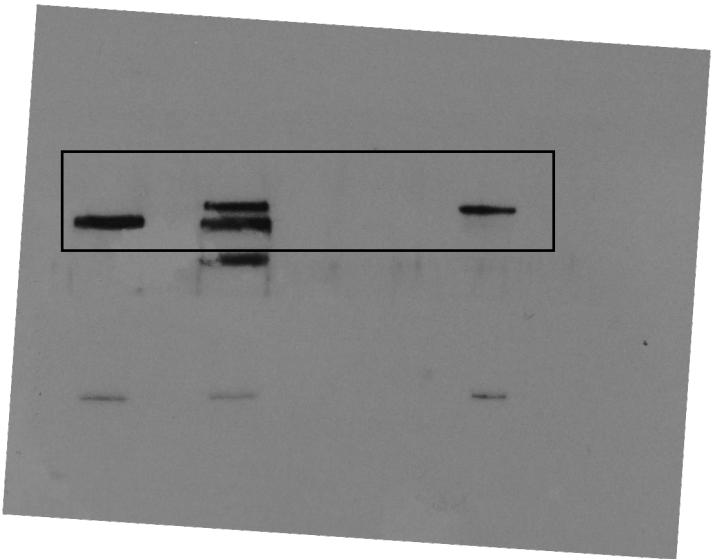

ICAM-1

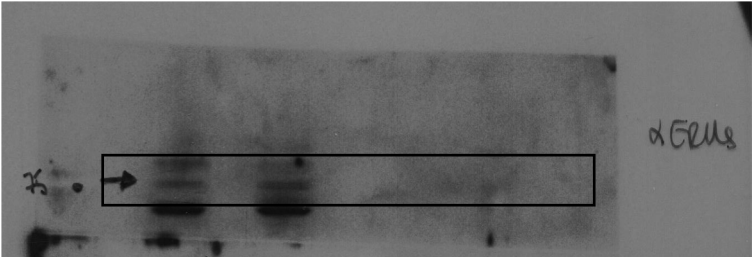

ERMs

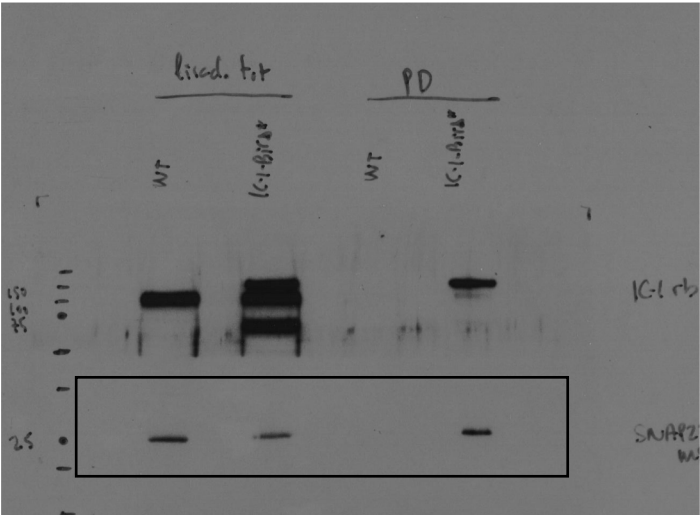

SNAP23

Supplement: fig6-figsupp1-data5 [file elife-89261-fig6-figsupp1-data5-v1.zip]

Fig. 7A

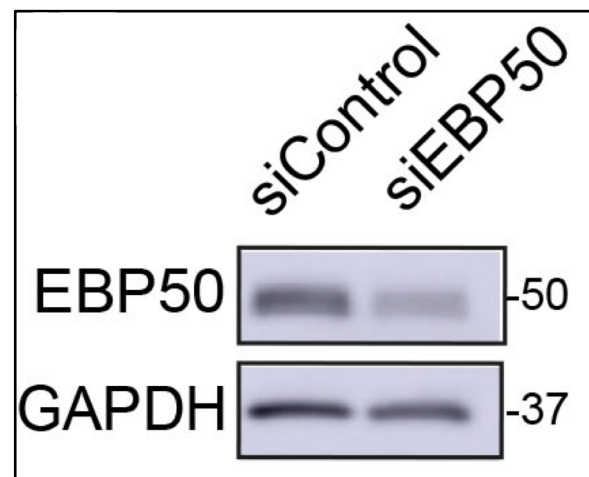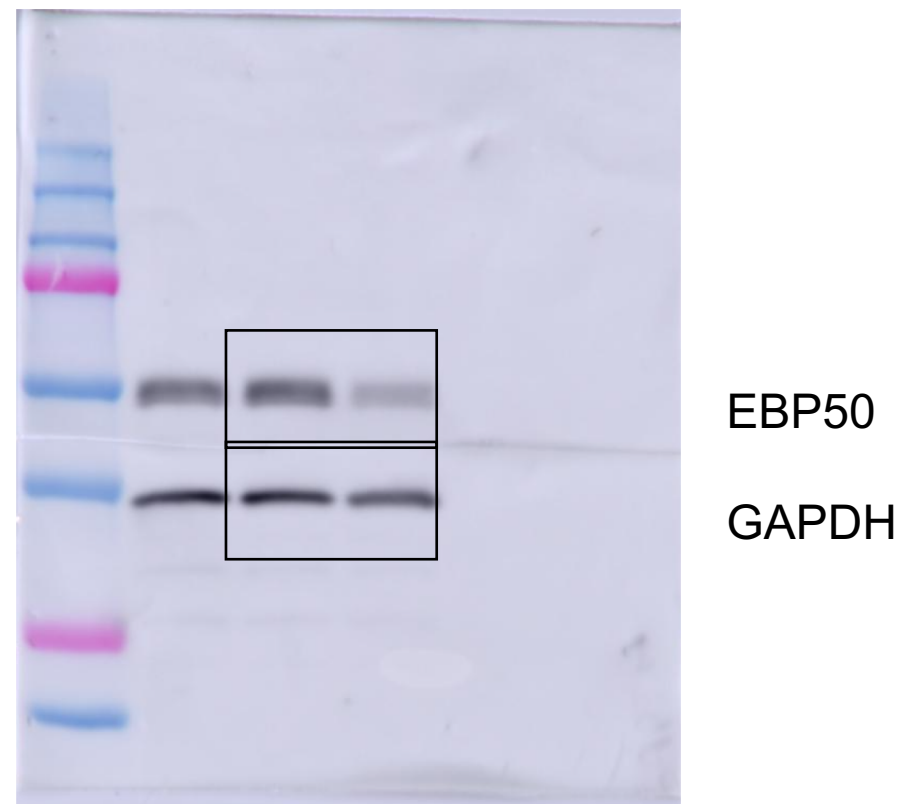

Supplement: fig7-data2 [file elife-89261-fig7-data2-v1.zip]

Fig8-supplement figure 1B

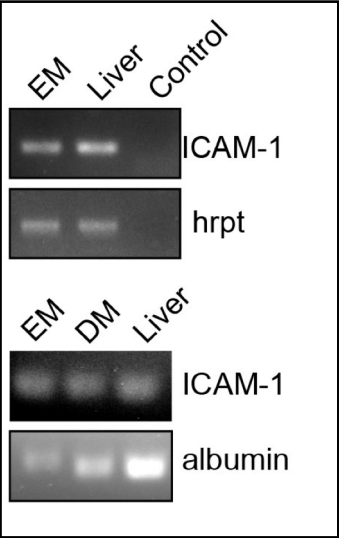

PCR ICAM-1 and hrpt

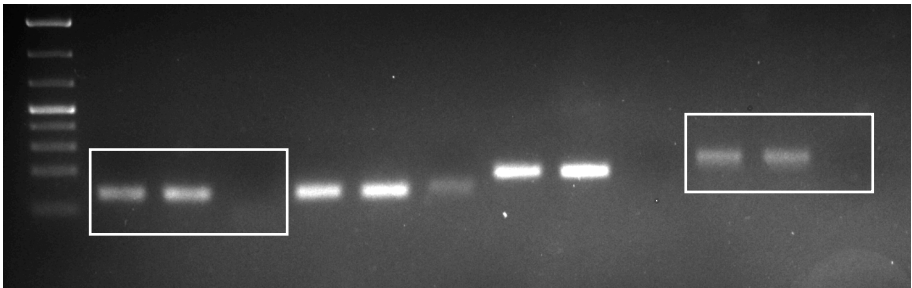

PCR ICAM-1 and albumin

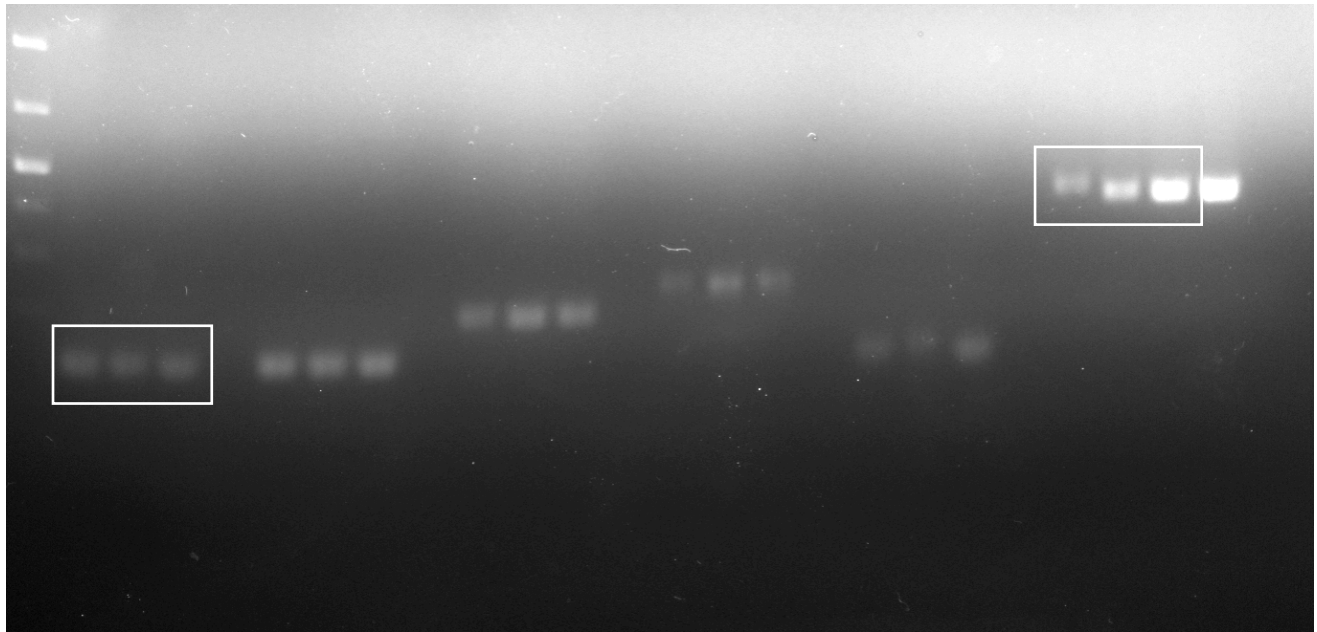

Supplement: fig8-figsupp1-data3 [file elife-89261-fig8-figsupp1-data3-v1.zip]
